# Supplementary material for: An explainable semi-supervised deep learning framework for mineral prospectivity mapping: DEEP-SEAM v1.0
Source: Copernicus journal article supplement (doi:10.5194/egusphere-2025-3283), 2025-09-15
Supplement: Supplementary file [file egusphere-2025-3283-AC2-supplement.pdf]

## Response to the Reviewers

### Reviewer 2

**Comment 2.1** — This manuscript describes a generalisable method for using a variety of digital representations of geology to locate mineralisation. The application is to hydrothermal REE deposits in the Curnamona Province, Australia. The method uses deep learning for prediction to locate unknown mineralisation, and Shapley values to explain which input features contribute most to the prediction. The submission is well-written and structured. The figures are a decent quality. There are some issues that need rectifying before this work can be published.

**Response:** Thank you for your positive assessment of our manuscript. We appreciate your recognition of our novel approach and are grateful for your detailed comments. We have addressed each of them carefully in our revision to further improve the quality of our paper. **Note: As advised not to upload the revised manuscript during the response process, please refer to the attached document for more detailed information regarding the specific revisions made in response to your comments.**

**Comment 2.2** — **Generalisability of the method.** The authors can provide some discussion to how DEEP-SEAM can be used for other mineralisation types. This will help the manuscript fit within the scope of the journal.

**Response:** We agree that discussing how DEEP-SEAM can be applied to other mineralisation systems would strengthen the manuscript. We have added a paragraph at the end of the Discussion and Conclusion section (Lines 651-670) that addresses the transferability of the DEEP-SEAM framework to different deposit types. Line649-668: The DEEP-SEAM framework is designed with potential generalisability and scalability, and its methodological principles are applicable to MPM across diverse mineralisation systems. The framework's ability to capture complex, non-linear relationships between multi-source geoscientific data and mineralisation probability establishes a theoretical foundation for its application to various deposit types. The potential transferability of DEEP-SEAM is built upon three key principles. First, the framework requires integration of deposit-specific evidence layers that reflect critical mineralisation processes, including geological proxies (e.g., structural features, lithological units, alteration zones), geochemical pathfinder elements, geophysical signatures, and remote sensing derivatives. The specific indicators employed vary with deposit type. For instance, orogenic Au systems commonly display Au-As-Sb associations; porphyry Cu deposits exhibit Cu-Mo-Au signatures; iron oxide-copper-gold (IOCG) systems are characterised by magnetic and gravity anomalies, whilst volcanic-associated massive sulphide (VMS) deposits display resistivity contrasts. The framework accommodates these variations through appropriate feature engineering and predictor variable selection. Second, the DL architecture within DEEP-SEAM can be adapted to different datasets through hyperparameter optimisation and structural adjustments, enabling the model to learn deposit-specific spatial patterns and feature interactions. This adaptive tuning process - involving adjustment of parameters such as network depth, learning rate, and dropout rate based on validation performance - represents standard practice in geoscientific machine learning applications where geological heterogeneity demands dataset-specific optimisation. Third, model interpretability through SHAP analysis provides a critical validation mechanism. By examining whether the model's predictive logic aligns with established metallogenic

theory and the geological context of the target area, geoscientists can assess the reliability of prospectivity delineation. This interpretability component ensures that the framework operates not as a black box but as a geologically informed predictive tool applicable across mineralisation systems.

**Comment 2.3 — Data reduction of geochemical assay.** RPCA is used, and is a better choice than PCA. However, the results in Figure A1 tell me that RPCA is not that effective for data reduction. Six principal components are required to explain > 70% of the variance. I wonder whether a non-linear method such as UMAP may be a better option. UMAP can act like an auto-encoder.

**Response:** Thanks for suggesting non-linear methods. We conducted additional experiments by applying UMAP to the ILR-transformed geochemical data (Please see the attached Fig. 1). Indeed, UMAP is capable of capturing complex nonlinear patterns and has been successfully used for exploratory visualization in various fields. However, the main objective of this study is not only dimensionality reduction but also the development of an interpretable workflow for MPM. RPCA provides linear and robust principal components that can be directly linked to geochemical element loadings, enabling the identification of key controlling factors in geochemical variability and mineralization processes. In contrast, UMAP functions as a nonlinear autoencoder-like embedding, in which each dimension is not explicitly associated with the original geochemical variables, thereby limiting geological interpretability. Therefore, RPCA was retained in this study for its interpretability and robustness, even though it requires more components to capture a high cumulative variance.

3D UMAP Embedding of Geochemical ILR-transformed Data

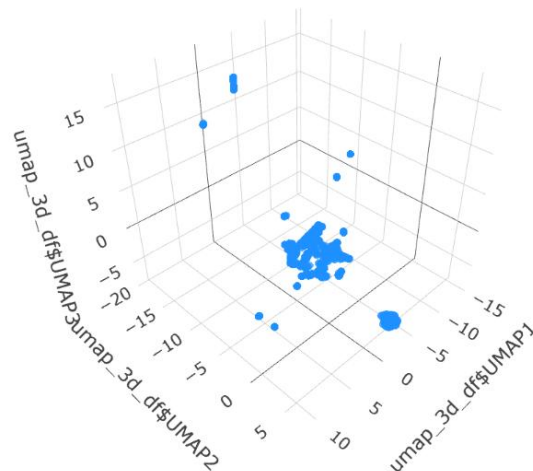

Figure 1. 3D UMAP Embedding of Geochemical ILR-transformed Data

**Comment 2.4 — Abundance of magnetic data derivatives versus other data.** The number of magnetic layers used indicates the authors think that REE deposits are best imaged using magnetics, however this

is not well-explained in the paper. What is the 2d correlation between these layers – i.e. are the same patterns presented in each, which can add bias?

**Response:** To fully obtain data related to mineralization, we conducted a thorough search on the website for data that could provide such information, which included so much aeromagnetic data. Aeromagnetic surveying uses highly sensitive magnetometers carried by aircraft to measure the Earth's magnetic field on the surface, which can effectively detect magnetic minerals underground, including REE deposits rich in magnetic minerals. In our study area, the REE mineralization is genetically associated with igneous intrusions and hydrothermal alteration zones, both of which exhibit distinct magnetic signatures. Different magnetic derivatives (e.g., reduced-to-pole, vertical derivative, tilt angle) can highlight different aspects of these geological structures, such as boundary edges, depth information, and subtle anomalies, making them complementary for capturing mineralization-related features. We share the reviewer's concern about potential 2D correlation between magnetic data layers, which could introduce bias into the model. To address this issue, we implemented a systematic correlation analysis during the data preprocessing stage. The Spearman correlation method (Hauke and Kossowski, 2011) was used to quantify relationships between all feature layers. We tested multiple correlation thresholds and evaluated their impact on model performance, ultimately determining 0.65 as the optimal threshold (Lines 259-261). Features exceeding this correlation threshold were removed to minimize redundancy while preserving the diverse information content necessary for robust prediction. This approach ensures that the retained magnetic layers contribute complementary information rather than duplicating the same patterns, thereby reducing potential bias in the model.

**Comment 2.5 — justification of the various features** with respect to REE mineralisation isn't well established. Aside from the comment regarding magnetics, an example is using a DEM. More detail is needed on which "geological processes and environmental conditions influence mineralisation" are revealed by DEM. I'm assuming the DEM represents erosion and rock competency, but you may be thinking of others. This is important when justifying feature engineering (L258-259).

**Response:** Table 2 is discussed with additional evidence demonstrating how our adopted datasets effectively support mineral prospectivity mapping. We added (1) Lines 201-205 Magnetic responses to REE mineralisation can be highly variable and depend on the nature of host rocks. White (2005) interprets the Yerila Granite (Table 1) in the study area not as a true granite (although parts of the protolith may have been deformed granite) but as a metasomatic allanite-rich rock, where the highest REE enrichment (Th, U, Zr, Y, and REEs) occurs in calcsilicate rocks that exhibit relatively distinct magnetic signatures compared to surrounding lithologies. (2) Lines 229-236: A compelling example of this relationship is demonstrated at REE Location D (Fig. 1), which represents a Cu-U-REE mineral system associated with hydrothermal fluid flow during the Ordovician (Zivak, 2024). The mineralisation is hosted within multiply deformed, pyrite-rich metasedimentary and metavolcanic rocks, where REEs and uranium are highly concentrated, predominantly in monazite and, to a lesser extent, in apatite (which locally contains up to 11% total REEs). Critically, both the radioactive elements and REEs were co-transported by hydrothermal fluids sourced from granitoid rocks along the eastern extremity of the Paralana Fault (Marshall, 1979). This genetic link between U-Th-K and REE enrichment provides a robust basis for using radiometric data as a proxy for REE prospectivity.. (3) Lines 247-257: Remote sensing is an important method for mineral prospecting, utilising hyperspectral and multispectral data to detect

hydrothermally altered minerals with diagnostic spectral absorption characteristics (Pour and Hashim, 2011). Metasomatism plays a crucial geochemical role in the concentration of REEs, U, and Th, often producing diagnostic mineralogical assemblages detectable through remote sensing (Khoshnoodi et al., 2016). For example, Location A (Fig. 1), defined by the Yerila Granite, demonstrates intense metasomatic enrichment that can be captured by remote sensing data. The Yerila Granite (~1560 Ma, Moolawatana Suite) is geochemically unique, with extremely high REE contents and exceptional radioactivity, making it possibly the most radioactive granite in Australia (White, 2005; Sheard, 2009). This enrichment is attributed to metasomatic processes that produced diagnostic REE-bearing minerals including allanite, monazite, yttriotitanite, and zircon, accompanied by K-feldspar alteration and fluorite mineralisation (White, 2005). These metasomatic assemblages and associated alteration minerals exhibit distinct spectral signatures in the visible-near infrared (VNIR) and shortwave infrared (SWIR) regions. (4) Lines 265- 274: For example, the high immediately to the west of REE Location G (Fig. 1), which is centred on Radium Ridge, demonstrates a clear relationship between topography and mineralisation. Radium Ridge is a prominent topographic feature extending approximately 3 km in an east-west direction, characterised by steep slopes on its southern flank and gentler gradients on the northern side (Sullivan et al., 1945). The steepest sections of the ridge result from differential weathering resistance of a silicified zone, which hosts small hydrothermal Fe-rich U and REE prospects along the ridge crest (Sullivan et al., 1945). This exemplifies how DEM data can capture the topographic expressions that result from structurally-controlled mineralisation and lithological contrasts caused by differential weathering and silicification processes, thereby serving as an indirect indicator of potential mineralised zones.

#### Reference:

- White, A.J.: Granites and Uranium Mineralisation in the Mount Painter Complex Northern Flinders Ranges. PIRSA, Adelaide, Open File Envelope 12288, unpublished, 2005.
- Zivak, D.: Rare Earth Element (REE) potential of the Curnamona Province, South Australia, Report Book 2024/00037. Department for Energy and Mining, South Australia, Adelaide, 2024.
- Marshall, N.J.: Geochemical Exploration Studies in the Mt. Painter Province. Department of Mines and Energy, South Australia Open File Envelope 3536, unpublished, 1979.
- Pour, A. B. and Hashim, M.: Identification of hydrothermal alteration minerals for exploring of porphyry copper deposit using ASTER data, SE Iran, *Journal of Asian Earth Sciences*, 42, 1309 – 1323, <https://doi.org/10.1016/j.jseaes.2011.07.017>, 2011.
- Khoshnoodi, K., Yazdi, M., Behzadi, M., and Gannadi-Maragheh, M.: Using of ASTER, ETM+ and gamma spectrometry airborne data to find the relationship between the distribution of alkali metasomatism and REE mineralization in the Bafq area, Central Iran., *Journal of Sciences, Islamic Republic of Iran*, 27, 65 – 77, 2016.
- Sheard, M.J.: Explanatory Notes for CALLABONNA 1:250000 Geological Map, sheet SH54-6. South Australia. Department of Primary Industries and Resources. Report Book, 2009/01, 2009.
- Sullivan, C.J., Broadhurst, E., and Sprigg, R.C.: Reports on individual uranium occurrences. In Dickenson S.B. et al., eds, Report on investigation of uranium deposits at Mount Painter, South Australia [during the period] June 1944 to September 1945, Part III(3), Report Book 40/1. South Australia Department of Mines, Adelaide,. 124 – 168, 1945.

**Comment 2.6** — Each of the **geophysical methods image different depths of the crust**. This is partly due to the physics of the method itself, but mostly due to station spacing and line spacing. Wider line

spacing means deeper minimum depths of imaging. Please explain this in context with the geophysical survey parameters.

**Response:** Thank you for this helpful comment. You're absolutely right that the depth each geophysical method images is influenced not only by the underlying physics of the method but also by the survey design. We have supplemented the manuscript with papers that provide more details of the data processing procedure. Taking the gravity data we used as an example to explain, this dataset is sourced from the South Australian Resources Information Gateway (SARIG), with detailed processing methods and original survey parameters documented in the official report from the Geological Survey of South Australia (Katona, 2017). Key points to note are: (1) Variability in spacing and effective resolution: The original station spacing is highly uneven, ranging from dense intervals of 50 metres to sparse ones of up to 50 kilometres (Katona, 2017, p. 30, Table 2). Whilst the final product is a regular 100-metre grid, the effective resolution is determined by line spacing rather than along-line station spacing (Katona, 2017, p. 39, Figure 2). For instance, even if stations along a line are spaced 100 metres apart, if the line spacing is 2 kilometres, the effective resolution in that area is limited to several hundred metres, capable only of reflecting larger-scale, deeper geological sources. (2) Quantification of survey parameters: Figure 33 in the report (Nominal Station Line Spacing map) quantifies and visualises the line spacing distribution across the entire state. Line spacing across our study area varies from 4,000 to 8,000 metres (please see the attached Fig. 2). The gravity data we employed consist of processed 100-metre grids (including Onshore Bouguer gravity anomaly, First vertical derivative, and Residual gravity), which complement information on deep large-scale and shallow small-scale anomalies. In response to your suggestion, we have added relevant references in the Methods section. Similar considerations apply to the magnetic and radiometric data used in this study.

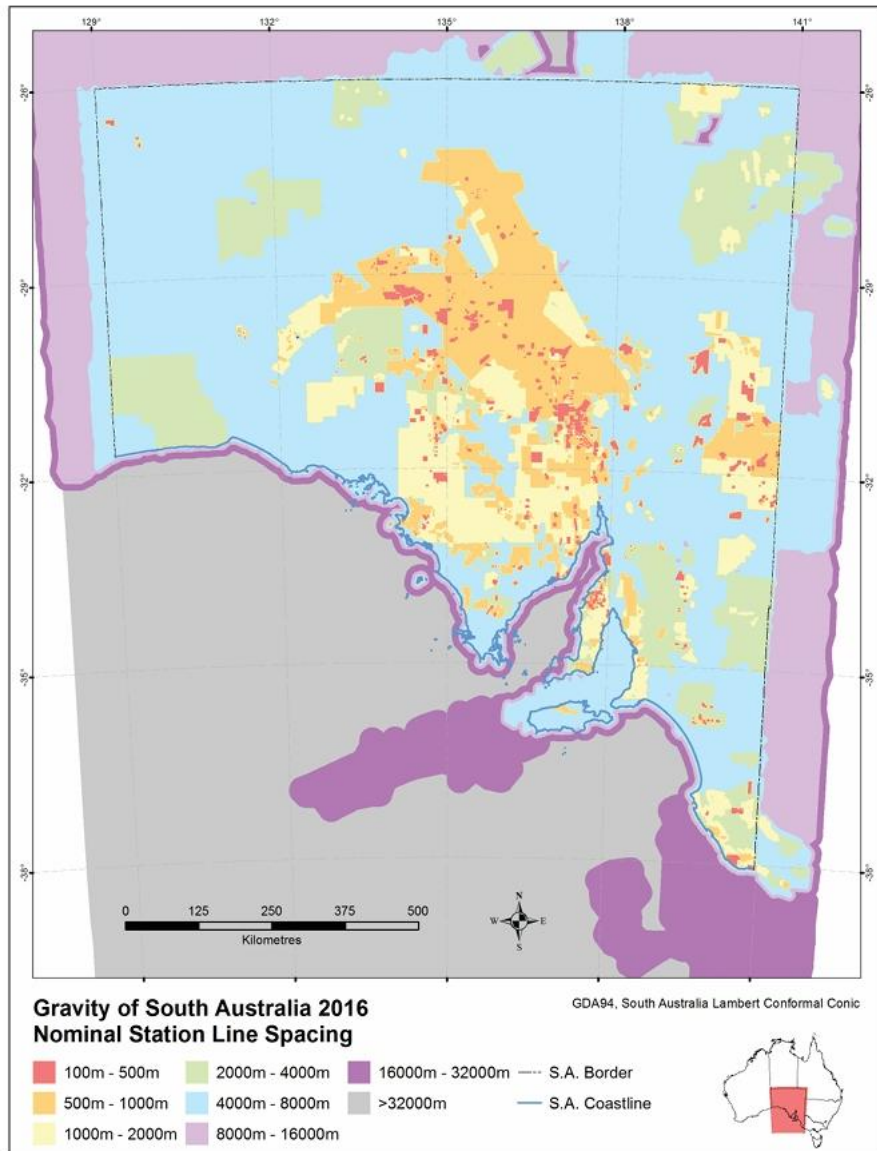

Figure. 2 Bouguer gravity 2016 reliability grid (station spacing). Nominal station line spacing takes the distance between lines of stations to be the station spacing, as opposed to the distance between stations along lines (Katona, 2017).

Reference:

Katona, L.F. 2017. Gridding of South Australian Ground Gravity Data, using the Supervised Variable Density Method. Report Book 2017/00012. Department of the Premier and Cabinet, South Australia, Adelaide.

**Comment 2.7** — The most interesting part of the study is **finding areas on unknown mineralisation**. However, there is limited analysis of the newly identified prospective areas. Examples are location 'X' (SW

of E), the area extending SW of 'E' and a blob SE of 'F'. Why would anyone go to these locations to acquire a tenement? Some geological analysis is needed.

**Response:** We added Lines 488-507: Additionally, the high prospectivity areas identified by the proposed framework, excluding known mineral occurrences, are subjected to further analysis (Fig. 5). Based on comprehensive review of historical exploration company reports, location X comprises a metamorphosed volcano-sedimentary sequence with radioactive metasediments subdivided into (a) allanite-bearing calc-silicates and (b) allanite-biotite schists and granitic gneisses, likely derived from tuffaceous protoliths. Allanite serves as the principal REE- and U-bearing phase (Teale, 1981). Grab samples display anomalous concentrations of Ce (up to 4600 ppm), Th (3600 ppm), Nb (900 ppm), U (600 ppm), W (180 ppm), and Sn (170 ppm) (Brewer, 1980). The area extending southwest of location E, known as the Paralana Plateau, represents another prospective target successfully delineated by the proposed framework. Historical exploration by Exoil N.L. around 1970 identified multiple sub-vertical monazite-bearing schist lenses ranging from 7 to 17 m in thickness and 30 to 170 m in length (Exoil, 1970). The indicated resource exceeds 5 million tonnes of schist with monazite grades of 5-6%. As monazite is a principal REE-bearing mineral (with some containing 50-70% total rare earth oxides), this represents REE mineralisation potential. The anomaly southeast of location F is located on a silicified ridge of Mesoproterozoic rocks near the East Painter Uranium Workings, and this area is characterised by uranium mineralisation associated with anomalous REE and Cu concentrations (Teale, 1993; Robertson et al., 2006). The spatial and geological association suggests potential for REE mineralisation, warranting field investigation to validate the model prediction. Taken together, the aggregate performance metrics and the spatial analysis of the prospectivity maps suggest that the parameter-optimised DL model, DevNet, characterises the complex associations between multivariate features and mineralisation probability, thereby enabling the use of available geoscience data to estimate mineral potential in underexplored areas.

**Comment 2.8** — The discussion needs to **explore geological reasons how shap values align with geological understanding**. Explore the mechanisms – what geological features contributing to mineralisation are magnetic? Why are others radioactive (e.g. lin469 to 472)? Are there any that are both magnetic and radioactive?

**Response:** We added Lines 550-559: The geological basis for this strong radiometric signature can be exemplified by Location C (Moolawatana), where a quartz-sericite schist exhibits locally high radioactivity as determined by scintillometer surveys. This schist contains anomalously high Ce (up to 1,400 ppm) and Th (with a Ce:Th ratio of approximately 1.7:1), indicating the presence of cerium-bearing allanite (McPhee et al., 1982). This mineral is likely the main contributor to the elevated prospectivity scores at this location. Although Ce was not among the elements used in litho geochemistry (Table 2), the allanite and/or its host rock likely contain other listed elements (e.g., Th, U, Y), thereby providing anomalously high indicator signals for this location. This example demonstrates the direct geological linkage between radioactive minerals (allanite hosting Th and U) and REE enrichment, validating the use of radiometric data as a diagnostic tool for REE prospectivity.

Reference:

McPhee K.A., Hodkinson I.P. and Mackie A.M.: Report for Exploration Licence 871 (Gunsight) for 6 Month Period Ending 28 February, 1982. Department of Mines and Energy, South Australia. Open File Envelope 3536, unpublished, 1982.

**Comment 2.9** — The results section opens with statements describing the interpretation of results for the results have been presented. E.g. “This study efficiently integrates multi-source exploration data and transforms them into a mineral prospectivity map utilising a semi-supervised DL model. Additionally, it provides interpretability for understanding the model’s prediction process” And “The DL-based mineral prospectivity model, DevNet, trained with optimised parameter configurations, effectively captures the complex mapping relationships between multidimensional features and mineralisation probability. The mineralisation probability is obtained by normalizing the anomaly scores output (the original value of the model output) by DevNet.” The readers need to make up their minds by viewing the results first before the authors can make these statements (which are really discussion items).

**Response:** Thank you for this valuable feedback. We have modified the description of the result section to distinguish it from the discussion section.

**Comment 2.10** — Not sure about anomaly detection being relevant to MPM. AD looks at a univariate signal, while MPM is a data fusion exercise. Anomalous prospectivity values - Just needs a clearer explanation

**Response:** We’ve moved this content from the Introduction to the Methods section and provided a clearer explanation: “Semi-supervised learning represents an intermediate paradigm between supervised and unsupervised learning approaches, leveraging the combination of limited labelled data and abundant unlabelled samples to drive model training (Ruff et al., 2019). This methodology enables enhanced predictive accuracy while simultaneously reducing annotation costs. This paradigm is particularly well-suited for anomaly detection (AD) tasks: under conditions where anomalous samples are extremely scarce while normal samples are relatively abundant, semi-supervised anomaly detection aims to identify observations that significantly deviate from the joint distribution of normal data and construct decision boundaries capable of effectively distinguishing between anomalous and normal patterns (Ruff et al., 2019; Zhang et al., 2018). Studies have demonstrated that with as little as 1% labelled anomalies, appropriate semi-supervised methods can achieve effective performance (Pang et al., 2019). Mineral deposits can be conceptualised as rare “geological anomalies” formed through the coupling of multiple geological processes (Cheng and Zhao, 2011). Ore-forming processes are typically accompanied by a series of geological anomalous phenomena and products (e.g., structural, lithological, mineralogical, and fluid-related), which are manifested in multi-source datasets including geological, geophysical, geochemical, and remote sensing data (Zhao, 2002). MPM enables the extraction of mineralisation-related anomalous information from these multi-source exploration datasets, thereby providing target area guidance for subsequent exploration deployment. However, some early semi-supervised AD methods implicitly assume “anomaly homogeneity” (i.e., anomalous samples are mutually similar; Liu et al., 2002; 2003), which often fails to hold in complex geological settings characterised by diverse mineralisation types and varying ore-forming mechanisms. Pang et al. (2019) proposed a semi-supervised neural architecture, known as DevNet, which directly optimises anomaly scores through an end-to-end network. This method leverages a few labelled outliers as prior information to accommodate anomalies exhibiting different abnormal behaviours. The approach has demonstrated excellent performance in fields such as network security intrusion detection, gear pitting fault detection, and geochemical anomaly identification (Alper et al., 2023; Luo et al., 2024; Zheng et al., 2024).”

**Comment 2.11** — Do occurrences, prospects and deposits have the same weight within your model?



**Response:** Yes, occurrences, prospects, and deposits are treated with equal weight in our model. All these mineralization points are assigned the same positive label (value = 1) during the training process. By allowing the model to learn from the patterns of all positive samples, we enable it to capture the full spectrum of geological signatures associated with REE mineralization systems, from small-scale occurrences to large deposits.

**Comment 2.12** — Negative samples are drawn > 5km from known deposits. Establish that this is reasonable (all deposits are known? Then why do prospectivity analysis?)

**Response:** Our choice of >5km distance for negative sampling follows established practices in mineral prospectivity modeling papers (Carranza et al. 2008; Zuo and Carranza, 2011; Nykänen et al. 2015). The 5km buffer ensures that negative samples are collected from areas unlikely to be influenced by known mineralization processes, while still maintaining sufficient spatial coverage for model training. Regarding the apparent contradiction between "known deposits" and prospectivity analysis, in our modeling approach, only a subset of known deposits was used for training purposes, while the remaining deposits were reserved for independent validation to assess model performance. More importantly, the primary objective of our prospectivity analysis is not to rediscover known deposits, but to identify previously unrecognized prospective areas that may host undiscovered REE mineralization. The model learns from the geological signatures associated with known mineralization and extrapolates these patterns to identify areas with similar characteristics that warrant further exploration attention.

Reference:

Carranza, E. J. M., Hale, M., & Faassen, C. (2008). Selection of coherent deposit-type locations and their application in data-driven mineral prospectivity mapping. *Ore Geology Reviews*, 33, 536–558.

Nykänen, V., Lahti, I., Niiranen, T., & Korhonen, K. (2015). Receiver operating characteristics (ROC) as validation tool for prospectivity models—a magmatic Ni–Cu case study from the Central Lapland Greenstone Belt, northern Finland. *Ore Geology Reviews*, 71, 853–860.

Zuo, R., & Carranza, E. M. J. (2011). Support vector machine: a tool for mapping mineral prospectivity. *Computers & Geosciences*, 37, 1967–1975.

**Comment 2.13** — L439 Success rate high accuracy – against what benchmarks/other studies?

**Response:** In our manuscript, the assessment of “high accuracy” is primarily based on a comparative analysis with previous deep learning – based mineral prospectivity studies that used similar evaluation metrics, in particular the proportion of known deposits captured within the top-ranked prospective areas (i.e., the success-rate curve). For example, Luo et al. (2023) reported that the success-rate curve of their metallogenic-factor VAE model showed that less than 60% of the known mineral deposits were located within the top 10% most anomalous areas predicted by the model. In a subsequent study, Luo et al. (2024)

showed that the VAE-CAPSNET-GAN model achieved a success rate in which 10% of the study area contained 64% of the known mineral deposits. In contrast, our DEEP-SEAM framework achieves a considerably higher concentration of known deposits in the highest-ranked prospective areas: the success-rate curve indicates that the top 10% of the study area identified by DEEP-SEAM contains 86% of the known mineral deposits. Since these comparative results with other models are not explicitly listed in the manuscript, we have revised the relevant sentence in the text to read: Success-rate analysis indicates that the top 2% of the study area contains 86% of the known mineral deposits, and 30% of the area delineates all the REE deposits (Fig. 6), demonstrating that DevNet can effectively reduce the search space for high-potential metallogenic targets.

Reference:

Luo, Z., Zuo, R., Xiong, Y., & Zhou, B. (2023). Metallogenic-factor variational autoencoder for geochemical anomaly detection by ad-hoc and post-hoc interpretability algorithms. *Natural Resources Research*, 32(3), 835-853.

Luo, Z., & Zuo, R. (2025). Causal discovery and deep learning algorithms for detecting geochemical patterns associated with gold-polymetallic mineralization: a case study of the edongnan region. *Mathematical Geosciences*, 57(1), 193-220.

**Comment 2.14** — You use features which image the subsurface (magnetics and gravity) and those limited to the surface (DEM, ASTER and, at the scale of this study, radiometrics). It would be interesting to look at the SHAP values and see whether surface versus deeper signatures are more useful.

**Response:** Thank you for this insightful suggestion. We have incorporated this analysis into the discussion section (Lines 599-609). The added text reads “ Furthermore, we employed SHAP values to comprehensively compare the relative importance of features from surface-indicative datasets (DEM, remote sensing, and radiometric data) and depth-indicative datasets (magnetic and gravity data) in producing high mineralisation probability scores (Fig. 9). The analysis reveals that the top four features contributing most significantly to the model's output anomaly scores are all derived from surface datasets, ranked as follows: Terrestrial\_Radiation\_Dose\_Mean, Geochemical\_PC1, Ferric\_Oxide\_Content\_Dissimilarity, and ALOH\_Group\_Composition\_Standard\_Deviation. This result demonstrates that although subsurface geophysical data (magnetic and gravity) effectively delineate structural frameworks and identify favourable host rocks, the surface expression of REE enrichment exhibits more prominent signatures. Radiometric data directly detect radioactive elements (e.g., Th and U) associated with REE enrichment, providing direct indicators of REE concentration. Remote sensing derivative indices effectively identify hydrothermal alteration minerals indicative of REE mineralisation. Geochemical data directly reflect the spatial distribution and enrichment-depletion patterns of REEs.”

**Comment 2.15** — Figure 10.Std based features have border effects. Does this impact the model training and degrade results? Can these border effects be removed?

**Response:** We have conducted a comprehensive examination of the spatial statistical feature extraction process within buffer zones. While most input layers demonstrate normal statistical behavior, we acknowledge that a small number of layers exhibit pronounced standard deviation anomalies at the study area boundaries, manifesting as edge effects. This phenomenon primarily stems from statistical bias introduced by buffer truncation. We discuss this issue from three perspectives: data characteristics, model mechanisms, and prediction outcomes. From a data characteristics perspective, evidence layers exhibiting high-frequency spatial variations experience significant statistical bias when truncated at buffer edges due to insufficient sample points, resulting in amplified standard deviations (for instance, the AIOH\_Group\_Composition\_Standard\_Deviation layer shown in Figure 10 in manuscript). Conversely, evidence layers with regional distribution characteristics maintain statistical consistency at boundaries, as their gradual variations are less susceptible to local truncation effects (such as AIOH\_Group\_Content\_Standard\_Deviation layer illustrated in attached Fig. 3b). This disparity represents a classical manifestation of "edge effects" in spatial statistics, constrained by study area boundary conditions and fixed buffer radius settings. However, this issue is confined to a limited number of high-variability layers rather than being a systematic problem. Regarding model mechanisms, our framework employs the DevNet model based on multi-source exploration data for mineralization anomaly extraction. The model's core strengths lie in its multi-layer feature fusion strategy and anomaly learning mechanism, which enhance resistance to local noise including edge effects. DevNet establishes a robust "normality baseline" by learning the distribution patterns of extensive unlabeled samples and their differences from limited known mineralization samples in latent space. During training, the model is guided by prior mineralization information to learn anomaly patterns associated with mineralization rather than focusing on local anomalies and noise at boundaries, thereby effectively diluting the influence of edge effects in input data. In terms of prediction outcomes, both the prediction results and model interpretability analysis demonstrate that despite the significant presence of edge effects in certain evidence layers (such as AIOH\_Group\_Composition\_Standard\_Deviation) that play important roles in the model, the final mineral prospectivity map shows no apparent boundary artifacts such as edge-concentrated high values or anomalous gradients. This indirectly confirms that edge effects are progressively attenuated through multi-source data fusion and model learning processes, without compromising overall prediction accuracy and reliability. In summary, while edge effects objectively exist in a minority of input layers, their impact on final mineralization anomaly extraction reliability remains minimal due to the selective influence of data characteristics, DevNet's noise resistance mechanisms, and the stability of prediction results. We will consider extending buffer zones or implementing boundary correction algorithms (such as mirror padding) for further optimization in future work.

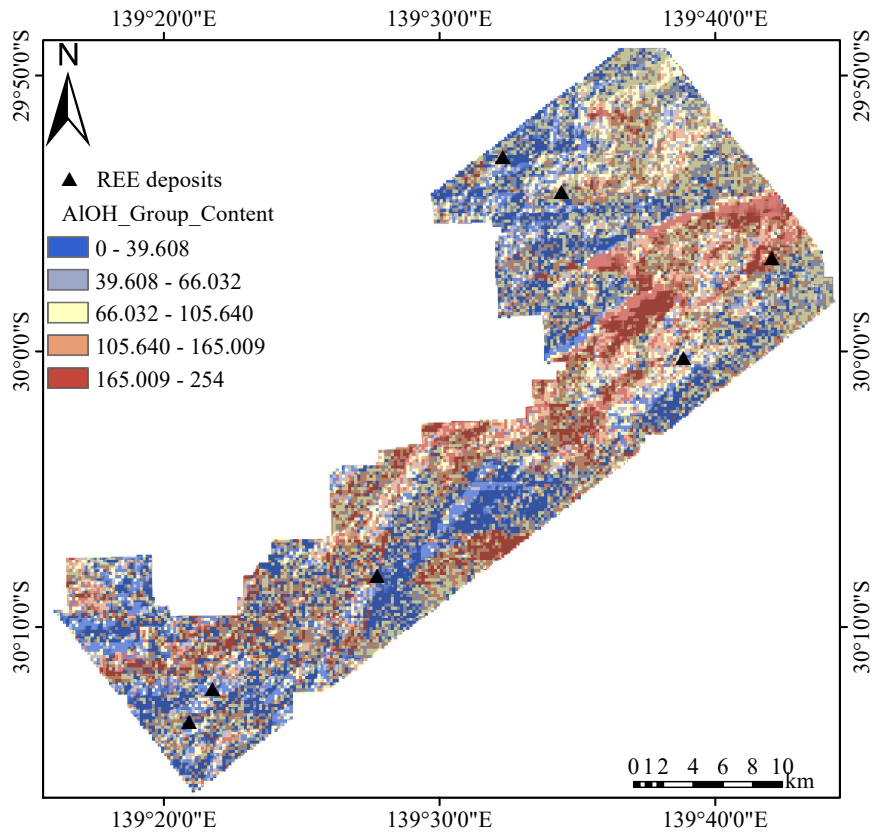

(a)

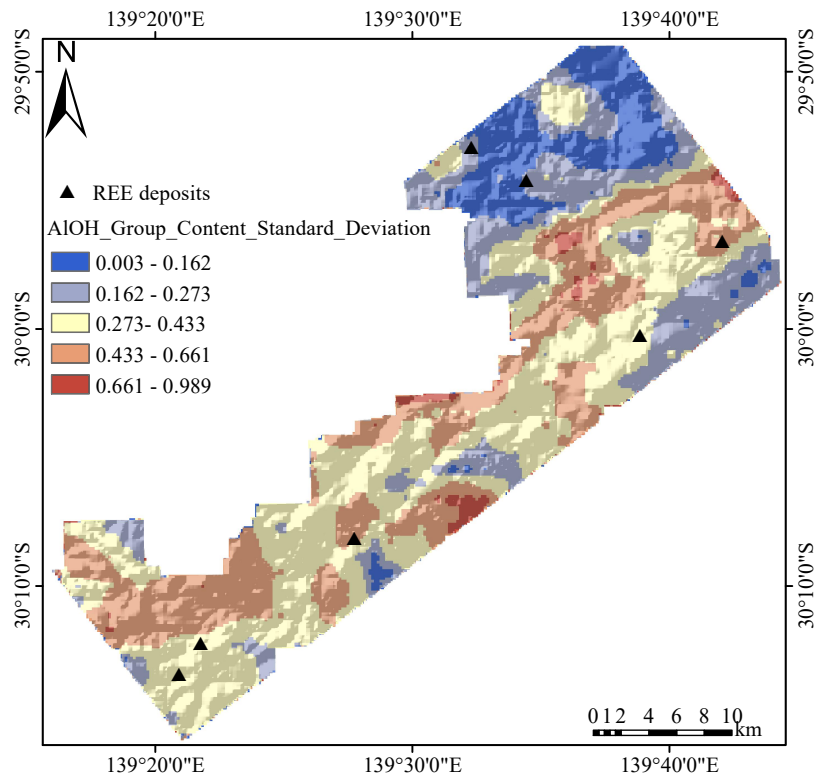

(b)

Figure3. ALOH Group Content: (a) original distribution; (b) standard deviation distribution
